# Supplementary material for: NASH limits anti-tumour surveillance in immunotherapy-treated HCC
Source: PubMed Central journal article supplement (PMC8046670; doi:10.1038/s41586-021-03362-0), 2021-03-24
Supplement: 41586_2021_3362_MOESM1_ESM.pdf [file 41586_2021_3362_MOESM1_ESM.pdf]

---

**Supplementary information**

---

**NASH limits anti-tumour surveillance in immunotherapy-treated HCC**

---

In the format provided by the authors and unedited

**Supplementary Table 1: Demographics patients included for flow cytometry analysis of human patients in Extended Data 9a-e**

|                                            | Control    | NAFLD/NASH  |
|--------------------------------------------|------------|-------------|
| Age (years), mean±SD                       | 46.5±14.1  | 55.3±10.2   |
| Sex                                        |            |             |
| Male                                       | 3 (37.5 %) | 10 (62.5 %) |
| Female                                     | 5 (62.5 %) | 6 (37.5%)   |
| BMI                                        | 21.0±2.8   | 30.5±5.3    |
| Obesity (BMI>30)                           | 0 (0.0 %)  | 8 (50.0 %)  |
| macrovesicular Steatosis in % (cut-off 5%) | <5.0±0.0   | 48.4±25.8   |
| NAS (0-8)                                  | 0.0±0.0    | 3.3±1.4     |
| Fibrosis (0-4)                             | 0.1±0.3    | 1.6±1.4     |

**Supplementary Table 2: Demographics patients included for flow cytometry analysis of human patients in Figure 3a,b and Extended Data 9f-g**

|                                            | Control     | NAFLD/NASH |
|--------------------------------------------|-------------|------------|
| Age (years), mean±SD                       | 45.2±6.5    | 52.6±14.7  |
| Sex                                        |             |            |
| Male                                       | 1 (16.67 %) | 6 (54.5%)  |
| Female                                     | 5 (83.33 %) | 5 (45.5 %) |
| BMI                                        | 41.0±9.8    | 40.5±10.2  |
| Obesity (BMI≥30)                           | 5 (83.33 %) | 8 (72.7 %) |
| macrovesicular Steatosis in % (cut-off 5%) | <5.0±1.9    | 22.7±17.5  |
| NAS (0-8)                                  | 1.5±0.5     | 3.8±0.9    |
| Fibrosis (0-4)                             | 1.2±0.4     | 1.8±0.4    |

**Supplementary Table 3: Demographics patients included for immunohistochemistry for progressive NAFLD/NASH**

|                         |      |
|-------------------------|------|
| Sex (% female)          | 35   |
| Age (average, years)    | 55.5 |
| BMI (average)           | 31.1 |
| T2DM (%)                | 67.7 |
| Disease stage (n-value) |      |
| NAFL                    | 9    |
| NASH F0/1               | 7    |
| NASH F2                 | 12   |
| NASH F3                 | 21   |
| NASH F4                 | 16   |
| NAS score (0-8)         | 4.4  |

**Supplementary Table 4: Quantification of PD-1<sup>+</sup> lymphocytes and percentage of CD8<sup>+</sup> lymphocytes/total lymphocytes count.**

|                                                | <b>PD-1 positive cases (cut-off 1%)</b> | <b>PD-1 positive cases/cm<sup>2</sup>, median (range)</b> | <b>Ratio CD8 positive /total lymphocytes (%)</b> |
|------------------------------------------------|-----------------------------------------|-----------------------------------------------------------|--------------------------------------------------|
| Healthy (n=4)                                  | 0 (0%)                                  | 0 (0)                                                     | 2.00%                                            |
| NASH (n=26)                                    | 5 (19.2%)                               | 0.1 (0 - 4.18)                                            | 26.10%                                           |
| Non-tumor adjacent NASH-HCC (n=16)             | 3 (18.7%)                               | 0.43 (0 - 2.4)                                            | 14.50%                                           |
| Non-tumor adjacent HCC other etiologies (n=29) | 0 (0%)                                  | 0 (0 - 0.06)                                              | 37.60%                                           |

**Supplementary Table 5: Quantification of immune infiltration in different types of liver samples. p values: NASH vs. non-tumor adjacent NASH-HCC  $p= 0.0012$ ; non-tumor adjacent NASH-HCC vs. non-tumor adjacent non-NASH-HCC  $p= 0.021$ .**

|          | <b>Healthy (n=4)</b> | <b>NASH (n=26)</b> | <b>Peri-tumoral<br/>NASH-HCC<br/>(n=16)</b> | <b>Peri-tumoral HCC<br/>other etiologies<br/>(n=29)</b> |
|----------|----------------------|--------------------|---------------------------------------------|---------------------------------------------------------|
| Absent   | 4 (100%)             | 0 (0%)             | 0 (0%)                                      | 0 (0%)                                                  |
| Mild     | 0 (0%)               | 9 (34.6%)          | 14 (87.5%)                                  | 14 (48.3%)                                              |
| Moderate | 0 (0%)               | 17 (65.4%)         | 2 (12.5%)                                   | 15 (51.7%)                                              |
| Marked   | 0 (0%)               | 0 (0%)             | 0 (0%)                                      | 0 (0%)                                                  |

**Supplementary Table 6: Distribution of cirrhosis in the study cohort.**

|                    | <b>NASH (n=26)</b> | <b>Peri-tumoral NASH-HCC (n=16)</b> | <b>Peri-tumoral Non-NASH-HCC (n=29)</b> |
|--------------------|--------------------|-------------------------------------|-----------------------------------------|
| F4 (cirrhosis)     | 25 (96.2%)         | 13 (81.3%)                          | 22 (75.9%)                              |
| non- F4 (F1-F2-F3) | 1 (3.8%)           | 3 (18.7%)                           | 7 (24.1%)                               |

**Supplementary Table 7: Pooled baseline characteristics of the patients included in the meta-analysis (total n= 1657).**

| <b>Trial:</b>             | <b>CheckMate 459</b> |                | <b>KEYNOTE-240</b> |                | <b>IMbrave150</b> |                | <b>Total</b> |                |
|---------------------------|----------------------|----------------|--------------------|----------------|-------------------|----------------|--------------|----------------|
| <b>Treatment</b>          | <b>ICI</b>           | <b>Control</b> | <b>ICI</b>         | <b>Control</b> | <b>ICI</b>        | <b>Control</b> | <b>ICI</b>   | <b>Control</b> |
|                           | <b>Nivo</b>          | <b>Sora</b>    | <b>Pembro</b>      | <b>Placebo</b> | <b>A+B</b>        | <b>Sora</b>    |              |                |
| <b>Number of patients</b> | 371                  | 372            | 278                | 135            | 336               | 165            | 985          | 672            |
| <b>Age, median</b>        | 65                   | 65             | 67                 | 65             | 64                | 66             | -            | -              |
| <b>Male, n (%)</b>        | 314 (85)             | 317 (85)       | 226 (81)           | 112 (83)       | 277 (82)          | 137 (83)       | 817 (83)     | 566 (84)       |
| <b>Region</b>             |                      |                |                    |                |                   |                |              |                |
| Asia, n (%)               | 147 (40)             | 148 (40)       | 67 (24)            | 31 (23)        | 133 (40)          | 68 (41)        | 347 (35)     | 247 (37)       |
| Rest, n (%)               | 224 (60)             | 224 (60)       | 211 (76)           | 104 (77)       | 203 (60)          | 97 (59)        | 638 (65)     | 425 (63)       |
| <b>ECOG PS-1, n (%)</b>   | 99 (27)              | 111 (30)       | 116 (42)           | 64 (47)        | 127 (38)          | 62 (38)        | 342 (35)     | 237 (35)       |
| <b>BCLC C, n (%)</b>      | 303 (82)             | 291 (78)       | 222 (80)           | 106 (79)       | 276 (82)          | 133 (81)       | 801 (81)     | 530 (79)       |
| <b>Etiology*</b>          |                      |                |                    |                |                   |                |              |                |
| Non-viral, n (%)          | 168 (45)             | 168 (45)       | 163 (59)           | 85 (63)        | 100 (30)          | 53 (32)        | 431 (44)     | 306 (46)       |
| HBV, n (%)                | 116 (31)             | 117 (31)       | 72 (26)            | 29 (22)        | 164 (49)          | 76 (46)        | 352 (36)     | 222 (33)       |
| HCV, n (%)                | 87 (23)              | 86 (23)        | 43 (16)            | 21 (16)        | 72 (21)           | 36 (22)        | 202 (21)     | 143 (21)       |

Abbreviations: Nivo: Nivolumab, Sora: Sorafenib, Pembro: Pembrolizumab, A + B: atezolizumab + bevacizumab, ICI: immune checkpoint inhibitor, n: number of patients.

\* One patient in the CheckMate 459 control arm had an unknown disease etiology.



**Supplementary Table 8: Baseline characteristics of 130 HCC patients treated with anti-PD-(L)1-based immunotherapy**

|                                                        | <b>NAFLD, n=13</b> | <b>Other etiology, n=117</b> | <b>p-value</b> |
|--------------------------------------------------------|--------------------|------------------------------|----------------|
| <b>Age (years), mean±SD</b>                            | 72.5±8.5           | 67.4±8.6                     | 0.046          |
| <b>Sex</b>                                             |                    |                              | 0.692          |
| Male                                                   | 12 (92%)           | 97 (83%)                     |                |
| Female                                                 | 1 (8%)             | 20 (17%)                     |                |
| <b>Body mass index (kg/m<sup>2</sup>), median IQR)</b> | 23.3 (22.8-26.3)   | 24.2 (22.3-28.4)             | 0.981          |
| <b>Child-Pugh stage</b>                                |                    |                              | 0.229          |
| A                                                      | 6 (46%)            | 76 (65%)                     |                |
| B                                                      | 7 (54%)            | 41 (35%)                     |                |
| <b>Performance status</b>                              |                    |                              | 0.723          |
| 0                                                      | 5 (39%)            | 51 (44%)                     |                |
| ≥1                                                     | 8 (62%)            | 66 (56%)                     |                |
| <b>Type of immunotherapy</b>                           |                    |                              | 0.037          |
| PD-(L)1 Monotherapy                                    | 9 (69%)            | 86 (74%)                     |                |
| Atezolizumab + bevacizumab                             | 3 (23%)            | 6 (5%)                       |                |
| Combination therapies                                  | 1 (8%)             | 25 (21%)                     |                |

|                                                                                                                                                                                                                     |            |             |       |
|---------------------------------------------------------------------------------------------------------------------------------------------------------------------------------------------------------------------|------------|-------------|-------|
| <b>Immunotherapy as systemic</b>                                                                                                                                                                                    |            |             | 0.092 |
| First-line                                                                                                                                                                                                          | 6 (46%)    | 27 (23%)    |       |
| Second-/third-line                                                                                                                                                                                                  | 7 (54%)    | 90 (77%)    |       |
| <b>Macrovascular invasion</b>                                                                                                                                                                                       | 3 (23%)    | 57 (49%)    | 0.079 |
| <b>Extrahepatic metastasis</b>                                                                                                                                                                                      | 10 (77%)   | 78 (67%)    | 0.547 |
| <b>Alpha-fetoprotein (ng/ml)</b>                                                                                                                                                                                    |            |             | 0.234 |
| ≤200                                                                                                                                                                                                                | 8 (62%)    | 49 (42%)    |       |
| >200                                                                                                                                                                                                                | 5 (39%)    | 62 (53%)    |       |
| <b>AST (U/l) median (IQR)</b>                                                                                                                                                                                       | 56 (40-90) | 63 (39-109) | 1.000 |
| <b>ALT (U/l) median±IQR</b>                                                                                                                                                                                         | 35 (24-54) | 38 (27-58)  | 0.807 |
| Abbreviations: AST, aspartate aminotransferase; ALT, alanine aminotransferase; BCLC, Barcelona-Clinic Liver Cancer; PS, Performance Status; HCC, hepatocellular carcinoma; NAFLD, non-alcoholic fatty liver disease |            |             |       |

**Supplementary Table 9: Multivariable analysis of prognostic factors in HCC patients treated with anti-PD-(L)1-based immunotherapy**

|                                         |                         | Overall survival    |                 | p-value (Cox regression) |
|-----------------------------------------|-------------------------|---------------------|-----------------|--------------------------|
|                                         |                         | HR                  | 95% CI          |                          |
| <b>Etiology</b>                         | <b>Other etiologies</b> | 1                   |                 | 0.017                    |
|                                         | <b>NAFLD</b>            | 2.6                 | 1.2-5.6         |                          |
| <b>Performance Status</b>               | <b>0</b>                | 1                   |                 | 0.049                    |
|                                         | <b>≥1</b>               | 1.7                 | 1.0-2.8         |                          |
| <b>Macrovascular invasion</b>           | <b>Absent</b>           | 1                   |                 | 0.016                    |
|                                         | <b>Present t</b>        | 1.8                 | 1.1-3.0         |                          |
| <b>Extrahepatic metastases</b>          | <b>Absent</b>           | 1                   |                 | 0.121                    |
|                                         | <b>Present</b>          | 0.7                 | 0.4-1.1         |                          |
| <b>Alpha-fetoprotein (ng/ml)</b>        | <b>≤200</b>             | 1                   |                 | 0.019                    |
|                                         | <b>&gt;200</b>          | 1.8                 | 1.1-2.9         |                          |
| <b>Child-Pugh class</b>                 | <b>A</b>                | 1                   |                 | 0.075                    |
|                                         | <b>B</b>                | 1.6                 | 1.0-2.6         |                          |
| <b>Confounder for survival (months)</b> | <b>Age</b>              | <b>&lt;65 years</b> | 16.2 (9.1-23.4) | 0.193                    |
|                                         |                         | <b>&gt;65 years</b> | 10.1 (7.7-12.5) |                          |
|                                         | <b>Gender</b>           | <b>Male</b>         | 11.1 (7.5-14.7) | 0.455                    |
|                                         |                         | <b>Female</b>       | 8.9 (5.5-12.4)  |                          |

**Supplementary Table 10: Baseline characteristics of 118 HCC patients treated with anti-PD-(L)1-based immunotherapy**

|                                                        | <b>NAFLD, n=11</b> | <b>Other etiology, n=107</b> | <b>p-value</b> |
|--------------------------------------------------------|--------------------|------------------------------|----------------|
| <b>Age (years), mean±SD</b>                            | 67.3±7.5           | 61.9±10.1                    | 0.046          |
| <b>Sex</b>                                             |                    |                              | 0.644          |
| Male                                                   | 9 (81%)            | 93 (83%)                     |                |
| Female                                                 | 2 (19%)            | 14 (17%)                     |                |
| <b>Body mass index (kg/m<sup>2</sup>), median IQR)</b> | -                  | -                            | -              |
| <b>Child-Pugh stage</b>                                |                    |                              | -              |
| A                                                      | 11 (100%)          | 107 (100%)                   |                |
| B                                                      | 0 (0%)             | 0 (0%)                       |                |
| <b>Performance status</b>                              |                    |                              | 0.382          |
| 0                                                      | 7 (64%)            | 19 (26%)                     |                |
| ≥1                                                     | 4 (36%)            | 55 (74%)                     |                |
| <b>Type of immunotherapy</b>                           |                    |                              | 1.000          |
| PD-(L)1 Monotherapy                                    | 11 (100%)          | 105 (98%)                    |                |
| Atezolizumab + bevacizumab                             | 0 (0%)             | 0 (0%)                       |                |
| Combination therapies                                  | 0 (0%)             | 2 (2%)                       |                |

|                                                                                                                                                                                                                     |            |             |       |
|---------------------------------------------------------------------------------------------------------------------------------------------------------------------------------------------------------------------|------------|-------------|-------|
| <b>Immunotherapy as systemic</b>                                                                                                                                                                                    |            |             | 0.330 |
| First-line                                                                                                                                                                                                          | 6 (54%)    | 39 (36%)    |       |
| Second-/third-line                                                                                                                                                                                                  | 5 (46%)    | 68 (64%)    |       |
| <b>Macrovascular invasion</b>                                                                                                                                                                                       | 4 (36%)    | 30 (28%)    | 0.441 |
| <b>Extrahepatic metastasis</b>                                                                                                                                                                                      | 6 (54%)    | 43 (40%)    | 0.233 |
| <b>Alpha-fetoprotein (ng/ml)</b>                                                                                                                                                                                    |            |             | 0.743 |
| ≤200                                                                                                                                                                                                                | 5 (50%)    | 60 (57%)    |       |
| >200                                                                                                                                                                                                                | 5 (50%)    | 44 (43%)    |       |
| <b>AST (U/l) median (IQR)</b>                                                                                                                                                                                       | -          | -           | -     |
| <b>ALT (U/l) median±IQR</b>                                                                                                                                                                                         | 46 (7-943) | 31 (11-165) | 0.397 |
| Abbreviations: AST, aspartate aminotransferase; ALT, alanine aminotransferase; BCLC, Barcelona-Clinic Liver Cancer; PS, Performance Status; HCC, hepatocellular carcinoma; NAFLD, non-alcoholic fatty liver disease |            |             |       |

**Supplementary Table 11: Antibodies for standard mouse flow cytometry**

| Fluorochrome    | Dilution | Name                   | Clone     | Cat #  |
|-----------------|----------|------------------------|-----------|--------|
| Alexa Fluor 488 | 1/400    | Donkey anti-rabbit IgG |           | 406416 |
| Alexa Fluor 488 | 1/200    | TCF1/7                 | C63D9     | 6444S  |
| Alexa647        | 1/200    | FOXP3                  | 150D      | 320014 |
| Alexa700        | 1/200    | CD4                    | RM4-5     | 100536 |
| APC             | 1/200    | CD11b                  | M1/70     | 101212 |
| APC             | 1/200    | CD44                   | IM7       | 103012 |
| APC             | 1/200    | IFN $\gamma$           | XMG1.2    | 505810 |
| APC             | 1/200    | NK1.1                  | PK136     | 108710 |
| BV421           | 1/200    | PD-L1                  | MIH5      | 564716 |
| BV421           | 1/200    | Blimp-1                | 5E7       | 564270 |
| BV421           | 1/200    | Tbet                   | 4B10      | 644832 |
| BV421           | 1/200    | CD19                   | 6D5       | 115549 |
| BV421           | 1/200    | CD11b                  | M1/70     | 101251 |
| BV421           | 1/200    | CD11c                  | N418      | 117343 |
| BV421           | 1/200    | NK1.1                  | PK136     | 108741 |
| BV421           | 1/400    | Donkey anti-rabbit IgG |           | 406410 |
| BV510           | 1/200    | CD45                   | 30-F11    | 103138 |
| BV605           | 1/200    | PD-1                   | 29F.1A12  | 135220 |
| BV605           | 1/200    | Ly-6G                  | 1A8       | 127639 |
| BV650           | 1/200    | TCR $\beta$            | H57-597   | 742483 |
| BV711           | 1/200    | CD11c                  | N418      | 117349 |
| BV711           | 1/200    | CD69                   | H1.2F3    | 104537 |
| FITC            | 1/200    | CD19                   | 6D5       | 115505 |
| FITC            | 1/200    | CD45                   | I3/2.3    | 147710 |
| FITC            | 1/200    | IL-10                  | JES5-16E3 | 505006 |
| FITC            | 1/200    | Ly-6C                  | HK 1.4    | 128005 |
| FITC            | 1/200    | TCR $\gamma\delta$     | UC7-13D5  | 107504 |
| FITC            | 1/200    | NK1.1                  | PK136     | 108706 |
| FITC            | 1/200    | IFN $\gamma$           | XMG1.2    | 505805 |
| FITC            | 1/200    | CD127                  | A7R34     | 135007 |
| PE              | 1/200    | CD274                  | 10F.9G2   | 124307 |
| PE              | 1/200    | CD69                   | H1.2F3    | 104508 |
| PE              | 1/200    | F4/80                  | BM8       | 123110 |

|             |              |                |             |             |
|-------------|--------------|----------------|-------------|-------------|
| PE          | 1/200        | Granzyme B     | NGZB        | 12-8898-80  |
| PE          | 1/200        | TNF            | MO6-XT22    | 506306      |
| PE          | 1/200        | Ly-6C          | AL-21       | 560592      |
| PE          | 1/200        | GZMB           | GB11        | GRB04       |
| PE          | 1/50         | TOX            | REA473      | 130-120-716 |
| PE/Cy7      | 1/200        | CD3            | 17A2        | 100220      |
| PE/Cy7      | 1/200        | NK1.1          | PK136       | 108713      |
| PE/Cy7      | 1/200        | F4/80          | BM8         | 123114      |
| PE/Dazzle   | 1/200        | CD11c          | N418        | 117348      |
| PE/Dazzle   | 1/200        | CD279          | RMP1-30     | 109116      |
| PE/Dazzle   | 1/200        | CD62L          | MEL-14      | 104448      |
| PE/Dazzle   | 1/200        | TNF            | MP6-XT22    | 506346      |
| PE-Cy7      | 1/200        | CD44           | IM7         | 103029      |
| PE-Cy7      | 1/200        | Eomes          | Dan11mag    | 25-4875-82  |
| PE-Cy7      | 1/200        | CD244          | 2B4         | 25-2441-82  |
| PerCP/Cy5.5 | 1/200        | CD8a           | 53-6.7      | 100734      |
| PerCP/Cy5.5 | 1/200        | I-A/I-E        | M5/114.15.2 | 107625      |
| PerCP/Cy5.5 | 1/200        | LY-6C          | HK1.4       | 128012      |
|             | 1/300        | CD16/32        | 93          | 101302      |
|             | 1/200        | Foxo1          | C29H4       | 2880T       |
| eFluor514   | 1/1000 (2mM) | Calcium Sensor |             | 65-0859-81  |

**Supplementary Table 12: Antibodies for mouse flow cytometry**

| Marker          | Fluorochrome | clone        | Company     | catalog-nr | Dilution |
|-----------------|--------------|--------------|-------------|------------|----------|
| Zombie aqua     | Live dead    |              | Biolegend   |            | 1/250    |
| BUV563          | CD45         | 30-F11       | BD          | 565710     | 1/400    |
| BUV661          | CD11B        | Mac-1        | BD          | 565080     | 1/400    |
| BUV805          | CD8          | 53-6.7       | BD          | 612898     | 1/100    |
| BUV496          | CD4          | GK1.5        | BD          | 564667     | 1/100    |
| BV570           | CD44         | IM7          | BioLegend   | 103037     | 1/100    |
| PE-Cy5          | TCRb         | H57-597      | Biolegend   | 109209     | 1/300    |
| PE-Cy5.5        | CD19         | ebio 1D3     | eBioscience | 35-0193-82 | 1/200    |
| Biotin          | NK1.1        | PK136        | BD          | 553163     | 1/100    |
| APC-Cy7         | KLRG-1       | 2F1/KLRG1    | BioLegend   | 138426     | 1/100    |
| AlexaFlour 647  | TIM3         | B8.2C12      | BioLegend   | 134005     | 1/100    |
| PerCP-eFlour710 | CD39         | 24DMS1       | eBioscience | 46-0391-80 | 1/200    |
| BV 650          | CD25         | PC61         | BioLegend   | 102038     | 1/100    |
| BV 785          | PD-1         | 29F.1A12     | BioLegend   | 135225     | 1/100    |
| BV 605          | CD73         | TY/11.8      | BioLegend   | 127215     | 1/200    |
| BV 421          | LAG3         | C9B7W        | BioLegend   | 125221     | 1/100    |
| FITC            | GZMB         | GB11         | BioLegend   | 515403     | 1/100    |
| PE-eFlour610    | FOXP3        | FJK-16s      | eBioscience | 61-5773-82 | 1/200    |
| PE-Cy7          | Tbet         | 4B10         | BioLegend   | 644823     | 1/100    |
| BV480           | Ki-67        | B56          | BD          | 566109     | 1/100    |
| BV 711          | TNF          | MP6-XT22     | Biolegend   | 506349     | 1/300    |
| PE              | Eomes        | Dan11mag     | eBioscience | 12-4875-82 | 1/200    |
| BUV 737         | IFN-g        | XMG1.2       | BD          | 564693     | 1/100    |
| AlexaFlour 700  | CTLA4        | UC10-4F10-11 | BD          | 565778     | 1/200    |
| BUV 395         | Streptavidin |              | BD          | 564176     | 1/200    |
|                 |              |              |             |            |          |
| Zombie NIR      | Live dead    |              | Biolegend   |            | 1/250    |
| BUV 563         | CD45         | 30-F11       | BD          | 565710     | 1/400    |
| BUV 805         | CD8a         | 53-6.7       | BD          | 612898     | 1/100    |
| BUV 496         | CD4          | GK1.5        | BD          | 564667     | 1/200    |



|                |              |             |             |            |       |
|----------------|--------------|-------------|-------------|------------|-------|
| BV 570         | CD44         | IM7         | BioLegend   | 103037     | 1/100 |
| BUV 737        | CD62L        | MEL-14      | BD          | 565213     | 1/400 |
| BUV 661        | CD11b        | M1/70       | BD          | 565080     | 1/400 |
| BV 785         | PD-1         | 29F.1A12    | BioLegend   | 135225     | 1/100 |
| PE-Cy5         | TCRb         | H57-597     | Biolegend   | 109209     | 1/300 |
| PE-Cy5.5       | CD11c        | N418        | eBioscience | 35-0114-82 | 1/400 |
| BV 421         | CD64         | X54-5/7.1   | BioLegend   | 139309     | 1/100 |
| Biotin         | CD103        | 2.00E+07    | Biolegend   | 121404     | 1/100 |
| FITC           | Ly-6C        | AL-21       | BD          | 553104     | 1/800 |
| BV 650         | CD206        | C068C2      | BioLegend   | 141723     | 1/100 |
| BV 711         | NK1.1        | PK136       | BioLegend   | 108745     | 1/100 |
| APC            | PD-L1        | 10F.9G2     | BioLegend   | 124311     | 1/150 |
| PE-Cy7         | MerTK        | DS5MMER     | eBioscience | 25-5751-82 | 1/200 |
| AlexaFlour 700 | Ly-6G        | 1A8         | BioLegend   | 127622     | 1/100 |
| BV 510         | F480         | BM8         | BioLegend   | 123135     | 1/100 |
| BB700          | MHCII        | M5/114.15.2 | BD          | 746197     | 1/400 |
| PE-eFlour610   | FOXP3        | FJK-16s     | eBioscience | 61-5773-82 | 1/200 |
| BV480          | KI67         | B56         | BD          | 566109     | 1/100 |
| BV 605         | CD73         | TY/11.8     | BioLegend   | 127215     | 1/200 |
| PE             | CD69         | H1.2F3      | BD          | 553237     | 1/100 |
| BUV 395        | Streptavidin |             | BD          | 564176     | 1/200 |

**Supplementary Table 13: Antibodies for human flow cytometry**

| Fluorochrome      | Marker      | clone       | Company          | catalog-nr | Dilution |
|-------------------|-------------|-------------|------------------|------------|----------|
|                   | Fc blocking |             | Biologend        | 422302     | 1/200    |
| BV510             | LD          | Zombie aqua | Biologend        |            | 1/250    |
| BUV395            | CD45        | HI-30       | BD               | 563792     | 1/200    |
| BUV496            | CD19        | SJ25C1      | BD               | 612938     | 1/100    |
| BUV563            | CD4         | SK3         | BD               | 566000     | 1/100    |
| BUV661            | HLADR       | G46-6       | BD               | 565073     | 1/400    |
| BUV615            | CD45RO      | UCHL1       | BD               | Customized | 1/200    |
| BUV737            | CD39        | TU66        | BD               | 564726     | 1/100    |
| BUV805            | CD3         | UCHT1       | BD               | 565515     | 1/100    |
| BV421             | PD-1        | EH12.2H7    | Biologend        | 329919     | 1/50     |
| BV570             | CD8         | RPA-T8      | Biologend        | 301038     | 1/100    |
| BV605             | CD127       | A019D5      | Biologend        | 351333     | 1/40     |
| BV650             | CD27        | O323        | Biologend        | 302827     | 1/100    |
| BV711             | CD11b       | ICRF44      | Biologend        | 301343     | 1/100    |
| PE-Cy5.5          | CD45RA      | MEM-56      | LifeTechnologies | MHCD45RA18 | 1/150    |
| PE-Cy5            | Pangd       | IMMU510     | Beckman Coulter  | IM2662U    | 1/40     |
| PE/Dazzle™ 594    | CD56        | 5.1H11      | Biologend        | 362543     | 1/50     |
| BB630-P2          | CD103       | BER-ACT8    | Biologend        | 350220     | 1/40     |
| PerCP-eFluor® 710 | KLRG1       | 13F12F2     | ThermoScientific | 46-9488-42 | 1/100    |
| AF488             | TCF1        | C63D9       | ABCAM            | 6444S      | 1/100    |
| BB630-P2          | Strep       |             | BD               | customized | 1/200    |
| BB790-P           | CTLA4       | BNI3        | BD               | 624296     | 1/50     |
| A647              | TCF1        | 7F11A10     | Biologend        |            | 1/100    |
| A700              | GZMB        | GB11        | BD               | 560212     | 1/200    |
| APC-C7            | Eomes       | WD1928      | EBiosciences     | 47-4877-41 | 1/50     |
| BV480             | Ki67        | B56         | BD               | 566109     | 1/100    |
| BV785             | TNF         | Mab11       | Biologend        | 502947     | 1/300    |

|        |       |         |              |            |       |
|--------|-------|---------|--------------|------------|-------|
| PE-Cy7 | FOXP3 | 236A/E7 | EBiosciences | 25-4777-42 | 1/25  |
| PE     | TOX   | 47      | BD           | 612567     | 1/100 |

| Fluorochrome | Marker    | Clone    | Company   | catalog-nr | Concentration |
|--------------|-----------|----------|-----------|------------|---------------|
| Zombie UV    | Live dead |          | Biolegend | 423108     | 1µl/test      |
| APC/Cy7      | CD45      | HI30     | Biolegend | 304014     | 1µl/test      |
| PerCP-Cy5.5  | CD3       | UCHT1    | Biolegend | 300430     | 1µl/test      |
| BV605        | CD56      | HCD56    | Biolegend | 318334     | 3µl/test      |
| AF700        | CD16      | 3G8      | Biolegend | 302026     | 3µl/test      |
| BV510        | CD15      | W6D3     | Biolegend | 323028     | 1µl/test      |
| PE/Cy7       | CD8       | RPA-T8   | BD        | 557746     | 3µl/test      |
| BV711        | PD-1      | EH12.2H7 | Biolegend | 329928     | 5µl/test      |

**Supplementary Table 14: Antibodies for Immunohistochemistry**

| Target            | Dilution | Clone      | Cat #       |
|-------------------|----------|------------|-------------|
| Ki-67             | 1/200    | RM-9106-S1 | RM-9106-S1  |
| CD8               | 1/200    | 4SM15      | 14-0808-82  |
| PD-1              | 1/100    | -          | AF1021      |
| PD-L1 (cryo)      | 1/200    | D5V3B      | 64988       |
| pSTAT1            | 1/100    | 58D6       | 9167        |
| pSTAT3            | 1/100    | D3A7       | 9145        |
| GP73              | 1/100    | C-15       | sc-48011    |
| CD44v6            | 1/500    | 9A4        | BMS145      |
| GS                | 1/100    | ab16802    | Ab16802     |
| Cleaved Caspase 3 | 1/300    | Asp175     | 9661        |
| Collagen IV       | 1/30     | Cedarlane  | CL50451AP-1 |

**Supplementary Table 15: Antibodies used for CyTOF analysis**

| Channel | Target       | Clone      | Vendor/Source   | Conjugation Method                                                          | Antibody cocktail | Dilution |
|---------|--------------|------------|-----------------|-----------------------------------------------------------------------------|-------------------|----------|
| 89Y     | CD45         | HI30       | Fluidigm        | n.a.                                                                        | surface           | 1:400    |
| 104Pd   | B2M          | 2M2        | Biologend       | ITCB-EDTA + <sup>104</sup> Pd(NO <sub>3</sub> ) <sub>2</sub> Trace Sciences | barcode           | 1:25     |
| 105Pd   | B2M          | 2M2        | Biologend       | ITCB-EDTA + <sup>105</sup> Pd(NO <sub>3</sub> ) <sub>2</sub> Trace Sciences | barcode           | 1:25     |
| 106Pd   | B2M          | 2M2        | Biologend       | ITCB-EDTA + <sup>106</sup> Pd(NO <sub>3</sub> ) <sub>2</sub> Trace Sciences | barcode           | 1:25     |
| 108Pd   | B2M          | 2M2        | Biologend       | ITCB-EDTA + <sup>108</sup> Pd(NO <sub>3</sub> ) <sub>2</sub> Trace Sciences | barcode           | 1:25     |
| 110Pd   | B2M          | 2M2        | Biologend       | ITCB-EDTA + <sup>110</sup> Pd(NO <sub>3</sub> ) <sub>2</sub> Trace Sciences | barcode           | 1:25     |
| 111Cd   | CD123        | 6H6        | Biologend       | Fluidigm MCP9                                                               | surface           | 1:100    |
| 112Cd   | CD45RA       | 4G11       | DRFZ            | Fluidigm MCP9                                                               | surface           | 1:100    |
| 113In   | HLA-DR       | L243       | DRFZ            | Fluidigm X8 + <sup>113</sup> InCl <sub>3</sub> (Trace Sciences)             | surface           | 1:100    |
| 114Cd   | CD4          | RPA-T4     | Biologend       | Fluidigm MCP9                                                               | surface           | 1:50     |
| 115In   | CD3          | UCHT1      | DRFZ            | Fluidigm X8 + <sup>115</sup> InCl <sub>3</sub> (Trace Sciences)             | surface           | 1:100    |
| 116Cd   | CD15         | W6D3       | Biologend       | Fluidigm MCP9                                                               | surface           | 1:25     |
| 139La   | CD8          | GN11/134D7 | DRFZ            | Abcam/Expedeon 139La Lightning Kit                                          | surface           | 1:400    |
| 140Ce   | CD14         | RMO52      | Beckman Coulter | Fluidigm X8 + <sup>140</sup> CeCl <sub>3</sub> (Trace Sciences)             | surface           | 1:100    |
| 141Pr   | CD206        | 15-2       | Biologend       | Fluidigm X8                                                                 | surface           | 1:100    |
| 142Nd   | CD19         | HIB19      | Fluidigm        | n.a.                                                                        | surface           | 1:100    |
| 143Nd   | CD117        | 104D2      | Fluidigm        | n.a.                                                                        | surface           | 1:100    |
| 144Nd   | CD1a         | HI149      | Biologend       | Fluidigm X8                                                                 | surface           | 1:200    |
| 145Nd   | CD1c (BDCA1) | AD5-8E7    | Miltenyi        | Fluidigm X8                                                                 | surface           | 1:100    |
| 146Nd   | TCR Va7.2    | 3C10       | Biologend       | Fluidigm X8                                                                 | surface           | 1:50     |
| 147Sm   | CD279 (PD-1) | EH12.2H7   | Biologend       | Fluidigm X8                                                                 | surface           | 1:100    |
| 148Nd   | PD-L1        | 29E.2A3    | Fluidigm        | n.a.                                                                        | surface           | 1:50     |
| 149Sm   | CD25         | 2A3        | Fluidigm        | n.a.                                                                        | surface           | 1:100    |
| 150Nd   | CD86         | IT2.2      | Fluidigm        | n.a.                                                                        | surface           | 1:100    |
| 151Eu   | CD278/ICOS   | C398.4A    | Fluidigm        | n.a.                                                                        | surface           | 1:100    |
| 152Sm   | CD103        | Ber-ACT8   | Biologend       | Fluidigm X8                                                                 | surface           | 1:200    |

|       |                                  |                   |                  |                                                           |         |       |
|-------|----------------------------------|-------------------|------------------|-----------------------------------------------------------|---------|-------|
| 153Eu | BDCA2                            | 201A              | Fluidigm         | n.a.                                                      | surface | 1:50  |
| 154Sm | CD163                            | GHI/61            | Fluidigm         | n.a.                                                      | surface | 1:100 |
| 155Gd | CD27                             | 2E4               | Sanquin          | Fluidigm X8                                               | surface | 1:800 |
| 156Gd | CD183<br>(CXCR3)                 | G025H7            | Fluidigm         | n.a.                                                      | surface | 1:50  |
| 157Gd | CD161                            | HP-3G10           | Biolegend        | Fluidigm X8 +<br>157GdCl <sub>3</sub> (Trace<br>Sciences) | surface | 1:100 |
| 158Gd | FceR1a                           | AER-37<br>[CRA-1] | Biolegend        | Fluidigm X8                                               | surface | 1:200 |
| 159Tb | CD197<br>(CCR7)                  | G043H7            | Fluidigm         | n.a.                                                      | surface | 1:50  |
| 160Gd | Tbet                             | 4B10              | Fluidigm         | n.a.                                                      | i.c.    | 1:50  |
| 161Dy | NKp46                            | 9E2               | Biolegend        | Fluidigm X8                                               | surface | 1:100 |
| 162Dy | FoxP3                            | PCH101            | Fluidigm         | n.a.                                                      | i.c.    | 1:50  |
| 163Dy | CD294<br>(CRTH2)                 | BM16              | Fluidigm         | n.a.                                                      | surface | 1:50  |
| 164Dy | CD141<br>(BDCA-3)                | AD5-<br>14H12     | Miltenyi         | Fluidigm X8                                               | surface | 1:200 |
| 165Ho | CD127<br>(IL-7Ra)                | A019D5            | Fluidigm         | n.a.                                                      | surface | 1:100 |
| 166Er | CD34                             | 581               | Fluidigm         | n.a.                                                      | surface | 1:50  |
| 167Er | Gata3                            | REA174            | Miltenyi         | Fluidigm X8                                               | i.c.    | 1:25  |
| 168Er | ROR<br>gamma<br>(RORC,N<br>R1F3) | REA278            | Miltenyi         | Fluidigm X8                                               | i.c.    | 1:25  |
| 169Tm | TCRgd                            | 11F2              | Miltenyi         | Fluidigm X8                                               | surface | 1:50  |
| 170Er | CD152<br>(CTLA-4)                | 14D3              | Fluidigm         | n.a.                                                      | i.c.    | 1:100 |
| 171Yb | CD68                             | Y1/82A            | Fluidigm         | n.a.                                                      | i.c.    | 1:100 |
| 172Yb | NKp44                            | 2.29              | Miltenyi         | Fluidigm X8                                               | surface | 1:100 |
| 173Yb | Granzyme<br>B                    | GB11              | Fluidigm         | n.a.                                                      | i.c.    | 1:400 |
| 174Yb | CD94                             | HP-3D9            | Fluidigm         | n.a.                                                      | surface | 1:50  |
| 175Lu | Eomes                            | WD1928            | Thermofis<br>her | Fluidigm X8                                               | i.c.    | 1:200 |
| 176Yb | CD56<br>(NCAM)                   | NCAM16<br>.2      | Fluidigm         | n.a.                                                      | surface | 1:200 |
| 194Pt | CD16                             | 3G8               | Biolegend        | Fluidigm 194Cis-<br>Platinum                              | surface | 1:200 |
| 195Pt | CD36                             | AC106             | Miltenyi         | Fluidigm 195Cis-<br>Platinum                              | surface | 1:400 |
| 196Pt | CD11c                            | Bu15              | Biolegend        | Fluidigm 196Cis-<br>Platinum                              | surface | 1:200 |
| 198Pt | CD11b                            | ICRF44            | Biolegend        | Fluidigm 198Cis-<br>Platinum                              | surface | 1:100 |
| 209Bi | CD38                             | HIT2              | Biolegend        | Fluidigm X8 + BiCl <sub>3</sub><br>(Sigma-Aldrich)        | sf      | 1:100 |
