# Supplementary material for: NASH limits anti-tumour surveillance in immunotherapy-treated HCC
Source: PubMed Central journal article supplement (PMC8046670; doi:10.1038/s41586-021-03362-0), 2021-03-24
Supplement: 41586_2021_3362_MOESM3_ESM.pdf [file 41586_2021_3362_MOESM3_ESM.pdf]

# Myeloid Gating strategy

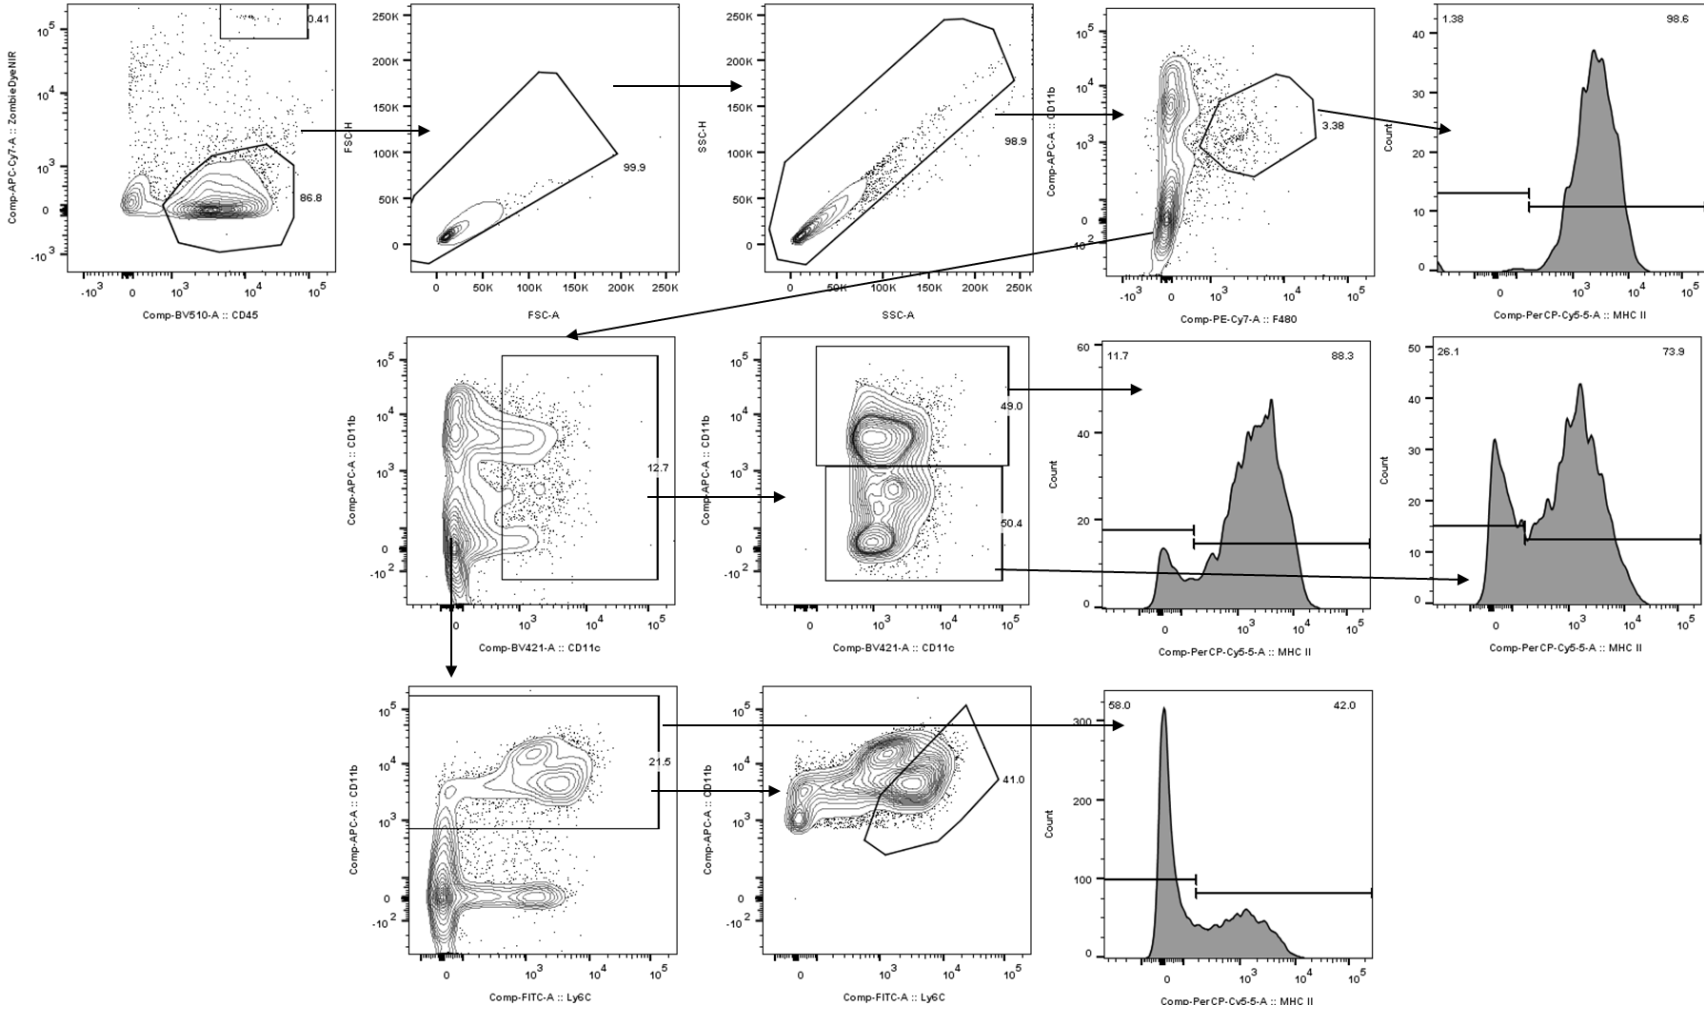

# Myeloid Gating strategy

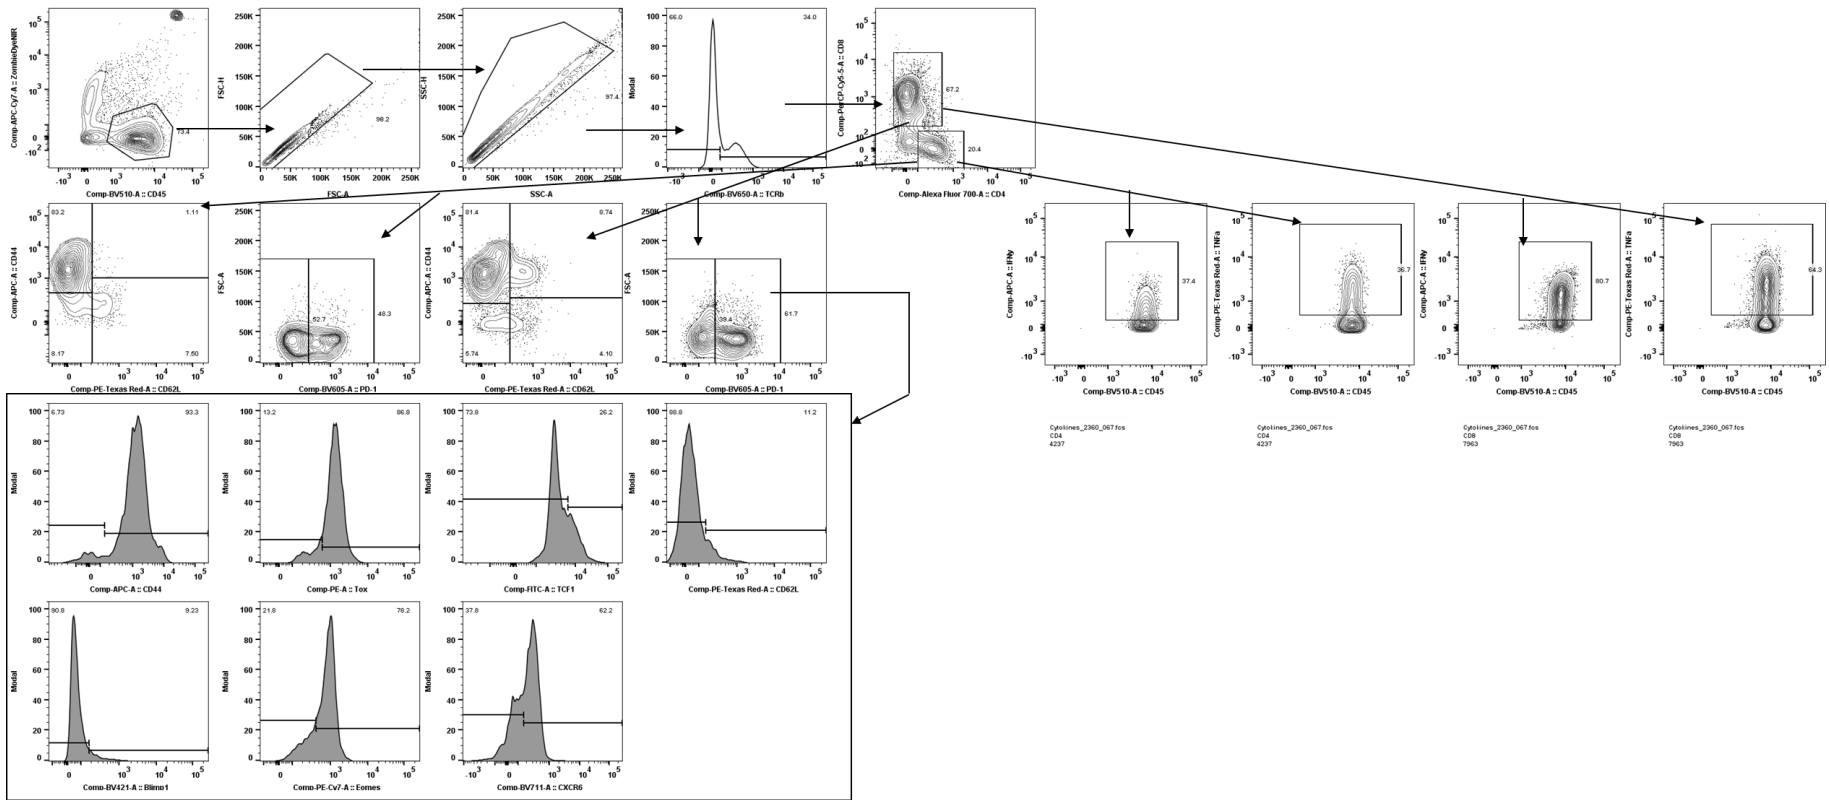

## Published gaiting strategies

- Gaiting strategy can be also found in Malehmir et al., 2019;  
<https://www.nature.com/articles/s41591-019-0379-5>
- Extended Data 9a-c (human gaiting strategy) can be found in  
[https://journals.lww.com/ctg/Fulltext/2019/07000/Immunologic\\_Features\\_of\\_Patients\\_With\\_Advanced.3.aspx](https://journals.lww.com/ctg/Fulltext/2019/07000/Immunologic_Features_of_Patients_With_Advanced.3.aspx)
